1 **The sensation of groove is affected by the interaction of rhythmic and harmonic complexity**

2

3 Tomas E. Matthews<sup>1\*</sup>, Maria A. G. Witek<sup>2,3</sup>, Ole A. Heggli<sup>2</sup>, Virginia B. Penhune<sup>1</sup> and Peter Vuust

4 <sup>2</sup>.

5

6 <sup>1</sup>Laboratory for Motor Learning and Neural Plasticity, Concordia University, Montreal, Canada;

7 <sup>2</sup>Center for Music in the Brain, Aarhus University & Royal Academy of Music, Aarhus, Denmark;

8 <sup>3</sup>Department of Music, University of Birmingham, UK.

9

10 \*Corresponding author at: Department of Psychology, Concordia University 7141 Sherbrooke St

11 W, Montreal, QC H4B 1R6

12 Email: [tomas\\_ma@live.concordia.ca](mailto:tomas_ma@live.concordia.ca)

13

14

15

16

17

18

19

20

21

22

23

24  
25  
26  
27  
28  
29  
30  
31  
32  
33  
34  
35  
36  
37  
38  
39  
40  
41  
42  
43  
44  
45  
46

47 **Abstract**

48 Groove is defined as the pleasurable desire to move to music. Research has shown that  
49 rhythmic complexity modulates the sensation of groove but how other musical features, such as  
50 harmony, influence groove is less clear. To address this, we asked people with a range of musical  
51 experience to rate stimuli that varied in both rhythmic and harmonic complexity. Rhythm  
52 showed an inverted U-shaped relationship with ratings of pleasure and wanting to move, whereas  
53 medium and low complexity chords were rated similarly. Pleasure mediated the effect of  
54 harmony on wanting to move and high complexity chords attenuated the effect of rhythm. While  
55 rhythmic complexity is the primary driver, harmony both modulates the effect of rhythm and  
56 makes a unique contribution via its effect on pleasure. These results may be accounted for by  
57 predictive processes based on rhythmic and harmonic expectancies that are known to contribute  
58 to musical pleasure or reward.

59

60

61

62

63

64

65

66

67

68

69

70

71

72

73

74

75

76

77

78

79

80

81

82

83

84

85

86

87

88

89

90

91

92           When listening to music we often find ourselves tapping or moving along to the beat.  
93   This has led to the study of groove, which is the pleasurable desire to move to music[1–3].  
94   Certain types of music are more likely to induce the sensation of groove than others. However,  
95   which specific aspects of music contribute to this sensation is less clear. Research on groove has  
96   focused on rhythmic complexity, and syncopation in particular, showing an inverted U-shaped  
97   relationship between degree of syncopation and ratings of pleasure and wanting to move [3].  
98   That is, medium levels of syncopation are rated higher than low or high levels. This research has  
99   largely examined rhythm in isolation, but other musical properties likely contribute to the  
100   sensation of groove. Harmony in particular may be a strong contributor because it modulates  
101   affective responses [4]. However, the extent to which harmony affects groove has not been  
102   investigated. Furthermore, few studies have examined the impact of musical training on the  
103   sensation of groove. Therefore, in the current study we developed a set of rhythmic stimuli that  
104   varied in both their degree of rhythmic and harmonic complexity. We asked people with a broad  
105   range of musical training to listen to and rate how much the stimuli made them want to move and  
106   how much pleasure they experienced. Our goals were to investigate whether harmonic  
107   complexity and its interaction with rhythm affects the sensation of groove. In addition, we  
108   investigated the effects of rhythmic complexity and musical training on groove.

109           Early definitions of groove focused on the degree to which a piece of music will induce  
110   the desire to move to the beat [5,6]. Moving along with music, especially through dance, is often  
111   accompanied by feelings of pleasure. In a seminal study on the sensation of groove, responses to  
112   a survey emphasized both the desire to move and the associated positive affect [1]. Since then,  
113   several rhythmic aspects have been studied in terms of their effectiveness in inducing groove.  
114   Music with a strong pulse or beat leads to higher groove ratings [7,8] and is more likely to

115 induce whole body movements, compared to music with a weak beat [9]. Percussiveness and  
116 event density have also been shown to influence the sensation of groove [7], whereas the effects  
117 of micro-timing and tempo are less clear [10–13].

118         A strong beat may be necessary for groove but is likely not sufficient. A ticking clock  
119 could be considered to have a strong beat but is unlikely to be something people want to dance  
120 to. Syncopation is a critical component of groove. It is often found in musical genres, such as  
121 jazz, soul, funk, Afro-Cuban, and Hip Hop [14,15], and is used by musicians intentionally to  
122 create groove [10]. An inverted U-shaped relationship has been shown between degree of  
123 syncopation, and ratings of pleasure and the desire to move, where moderately syncopated  
124 rhythms are rated as having the highest groove [3]. Syncopation occurs when a note falls on a  
125 metrically weak beat, and is then followed by a silence on a strong beat [16,17]. Meter is the  
126 pattern of strong and weak beats which may or may not be acoustically present in the rhythm.  
127 Syncopation works against this meter by emphasizing a weak beat and de-emphasizing a strong  
128 beat. This leads to violations of metric expectations [18–20] thus creating tension between the  
129 rhythm and the established meter. However, rather than reducing pleasure, listeners rate  
130 syncopated sequences as more enjoyable and sounding happier than non-syncopated sequences  
131 [21].

132         There are a number of non-rhythmic musical features that may contribute to the sensation  
133 of groove, including timbre, bass frequency content, and musical structure [22]. A particularly  
134 relevant potential contributor to groove is harmony because it evokes emotional valence, even  
135 for a single isolated chord [4,23,24]. Also, increasing the number of instruments, including  
136 harmony producing instruments, leads to higher groove ratings [25]. Therefore, stimuli with both  
137 rhythmic and harmonic properties are more likely to engage us, both bodily and affectively, than

138 rhythms alone. While no current studies directly address whether harmonic complexity interacts  
139 with rhythmic complexity to affect musical enjoyment, there is evidence that consonance affects  
140 motor synchronization [26] and feelings of entrainment [27]. Therefore, in the present study we  
141 combined both rhythm and harmony to create more ecologically valid stimuli and test the effect  
142 of harmony on the sensation of groove.

143         To do this we varied rhythm and harmony in a similar fashion by choosing rhythms and  
144 chords that fall into three levels of complexity. Rhythms were classified based on their degree of  
145 syncopation. Chords were classified based on their degree of dissonance, which depends on both  
146 musical experience and psychoacoustic factors such as roughness and harmonicity [28–31].  
147 Although chords most often occur in music as part of a sequence of several different chords,  
148 some groove-based genres, such as salsa, funk, and house music, frequently feature only one or  
149 two chords (James Brown’s ‘The Payback’ is a well-known example). Recent studies have  
150 shown that the harmonic complexity of isolated chords affect ratings of emotion and arousal  
151 [24] and that chords of intermediate complexity are preferred over highly consonant or dissonant  
152 chords [32]. This result supports the inverted U hypothesis which, as discussed above, has been  
153 shown for rhythmic complexity, and is theorized to be a domain-general phenomenon [33], albeit  
154 genre-dependent [34]. Additionally, isolated minor chords showed greater neural activity in  
155 emotion-related brain regions than major chords [4].

156         As affective, aesthetic and embodied effects of music are highly subjective and  
157 dependent on experience, musical training is likely to influence how individuals experience  
158 groove. Musicians show greater activity in emotion and reward-related brain regions while  
159 listening to music [35,36] and are more likely to employ action-based processing [37]. Further, it  
160 has been suggested that the inverted U-shaped relationship between complexity and liking

161 disappears as musical training increases and other ‘learned aesthetic criteria’ become stronger  
162 predictors for music preference [34, pg. 608]. Several studies have suggested that musical  
163 training has little or no effect on groove ratings [3,38] or leads to lower groove ratings [25],  
164 while interest in dancing correlates positively with groove ratings [3]. Conversely, musicians  
165 have shown a greater effect of syncopation on groove ratings [39], stronger motor response to  
166 high groove music [38] and larger error-related neural response to rhythmic violations, compared  
167 to non-musicians [40]. For harmonic complexity in the context of chords, musicians show higher  
168 liking ratings [24], greater differences in ratings of consonance [4,23] and larger mismatch  
169 negativity brain responses [41]. These results suggest that musical training leads to a greater  
170 sensitivity to consonance-dissonance manipulations, but that musical training may or may not  
171 influence the effect of rhythm on groove.

172           Taken together, the sensation of groove involves both a motor and affective response, and  
173 is predicted by syncopation, while harmonic aspects have yet to be investigated. Harmony affects  
174 perceived emotional valence and is therefore a potential contributor to groove and may interact  
175 with rhythm. Therefore, we used an online rating study to investigate whether harmonic  
176 complexity interacts with rhythmic complexity to affect its inverted U-shaped relationship with  
177 ratings of pleasure and wanting to move. That is, to investigate whether rhythm and harmony  
178 interact to increase the subjective experience of groove in a synergistic rather than additive  
179 fashion. Effects of musical training, interest in groove music and dancing were also investigated.

180

181 **Methods**

182 **Ethics statement**



183           This study investigates subjective experiences of music via a web-based survey. The  
184 study was conducted through the Centre for Music in the Brain at Aarhus University, therefore,  
185 ethics were governed by the Central Denmark Region Committees on Health Research Ethics.  
186 According to their Act on Research Ethics Review of Health Research Projects (Act 593 of 14  
187 July 2011, section 14.1), only health research studies shall be notified to the Committees. Our  
188 study is not considered a health research study (section 14.2) and therefore did not require ethical  
189 approval nor written/verbal consent, regardless of participants' age. When recruited, participants  
190 were informed that their responses would be used for research purposes. Participants were  
191 anonymized, and no IP addresses were collected or stored. They were free to exit the survey at  
192 any time and were provided with an email address at the end of the survey to which they could  
193 address any questions or concerns.

194

## 195 **Participants**

196           Two hundred and one participants between the ages of 17 and 79 ( $M = 34.74$   $SD = 13.24$ )  
197 completed the survey (96 reported as female). Participants reported their nationality as being  
198 from countries in six different continents, with a majority in Europe ( $n = 130$ ) and North  
199 America ( $n = 47$ ). As can be seen in Table S1, there was a large range of musical training  
200 backgrounds. A majority ( $n = 189$ ) of participants reported no university-level music degree. Of  
201 those currently playing music, a majority played piano ( $n = 50$ ), guitar ( $n = 44$ ) or sang ( $n = 25$ )  
202 and had 14.5 ( $SD = 5.31$ ) years for formal music training. Musician responders played largely  
203 classical ( $n = 69$ ) or pop/rock ( $n = 62$ ) genres.

204           Two subsets of the total sample were categorized as musicians ( $n = 58$ , 15 F) and non-  
205 musicians ( $n = 51$ , 18 F). Musicians were defined as those who reported at least eight years of

206 formal music training ( $M = 14.5$ ,  $SD = 5.31$ ) and were currently practicing on a weekly or more  
207 frequent basis (hours per week:  $M = 6.52$ ,  $SD = 8.51$ ). Non-musicians were defined as those who  
208 reported less than three years of formal training ( $M = 0.21$ ,  $SD = 0.49$ ) and were not practicing  
209 on a weekly or more frequent basis.

210

## 211 **Stimuli**

212 The stimuli consisted of short musical sequences that varied across three levels (Low,  
213 Medium, High) of both rhythmic and harmonic complexity. There were three different rhythms  
214 for each level of rhythmic complexity and three different chords for each level of harmonic  
215 complexity. These were combined into six versions of each rhythmic and harmonic complexity  
216 combination for a total of 54 stimuli. All stimuli were created using Cubase Pro version 8.0.30  
217 (Steinberg Media Technologies).

218 Each sequence consisted of a rhythmic chord pattern with one repeated chord in a piano  
219 timbre presented at 96 beats per minute in common time (see example stimuli in Fig 1). Each  
220 sequence also included an isochronous hi-hat pattern with an inter-onset interval (IOI) of .3125  
221 seconds, corresponding to an eighth note. The hi-hat provided a metrical context for the rhythms  
222 and prevented participants from perceptually shifting the beat of the high-complexity rhythms to  
223 reduce perceived complexity. Each piano chord lasted approximately .373 seconds including the  
224 full decay and were considered as eighth notes except in two of the high complexity rhythms which  
225 included IOI's of .234 seconds corresponding to a dotted sixteenth note. Each sequence lasted one  
226 bar which was repeated four times for a total length of ten seconds.

227

228 **Fig 1. Stimuli example.** Transcription of an example stimuli with a medium complexity rhythm  
229 (son clave) and a medium complexity chord (four note chord with extensions). The upper bar  
230 denotes the hi-hat.

231

### 232 *Rhythmic complexity*

233 Rhythms at all three levels of complexity consisted of five onsets in a 3+2 rhythmic  
234 pattern, that is, the first half of the bar consisted of 3 onsets, and the latter of 2 onsets. Medium  
235 complexity rhythms consisted of the son clave, the rumba clave, and an experimenter-created  
236 rhythm (see Fig S1 for a schematic depiction of all rhythms). The claves were chosen as they  
237 induce a strong sense of beat despite including syncopations. The son clave and rumba clave are  
238 widely used in South American and particularly Afro-Cuban music but are also found in many  
239 forms of western music including pop, jazz and electronic dance music. Low complexity  
240 rhythms followed the same 3+2 rhythmic pattern as the medium complexity rhythms with all  
241 syncopation removed so that all onsets fall on strong beats. High complexity rhythms also  
242 followed the 3+2 rhythmic pattern, however only the first of the five onsets fell on strong beat  
243 points.

244 The degree of syncopation was quantified using the syncopation index created by Fitch  
245 and Rosenfeld [16] based on the formalization of syncopation by Longuet-Higgins and Lee [17].  
246 Each syncopation in a sequence was given a weight based on the position of the rests and  
247 preceding notes involved, then these values are summed for an overall index for that sequence.  
248 The syncopation indices are summarized in Fig 2A. C-scores were also calculated for each  
249 rhythmic sequence (see Fig 2B). The C-score, created by Povel and Essens [42], is the amount of  
250 counterevidence a rhythm provides against a given metrical interpretation based on the number

251 of weak accents and silences falling on predicted beat points. C-scores and syncopation indices  
252 were highly correlated ( $r(7) = 0.99, p < .05$ ) and both were highly consistent within each level of  
253 rhythmic complexity.

254

255 **Fig 2. Indices of rhythmic and harmonic complexity.** Scatterplots of measures of rhythmic  
256 complexity: (A) syncopation indices and (B) C-scores; and of harmonic complexity: (C) peak  
257 roughness and (D) inharmonicity.

258

### 259 *Harmonic complexity*

260 There were three chords for each of the three levels of harmonic complexity (Low,  
261 Medium, and High). All chords were in the key of D major and included six notes spanning four  
262 octaves (D2 to #D5; see Fig S2). Low complexity chords consisted of the D major triad and two  
263 inversions. Medium complexity chords consisted of four note chords with extensions. High  
264 complexity chords included a flat ninth interval between chord note and extension which is  
265 considered highly dissonant, when not specifically occurring as flat 9<sup>th</sup> on major 7<sup>th</sup> chord,  
266 according to contemporary harmonic theory [43–45].

267 In order to quantify chord consonance, measures based on both acoustic and harmonic  
268 theory were used. The acoustic measures of roughness and inharmonicity were calculated with  
269 the MIRtoolbox [46]. Roughness is due to combining sounds with similar frequencies, which  
270 causes beating and sensory dissonance [47,48]. Inharmonicity refers to the degree to which the  
271 partials in a chord are integer multiples of the fundamental frequency [46]. A measure of  
272 consonance based on harmonic theory, called the aggregate dyadic consonance (ADC) [49] uses  
273 relations between pitch class sets rather than acoustic properties. Each interval class is given a

274 consonance value which is multiplied by the number of occurrences of this interval class then  
275 summed for each chord.

276 As can be seen in Fig 2C, peak roughness increased with level of harmonic complexity.  
277 Mean roughness shows a similar pattern (see Fig S3). Inharmonicity increased with level of  
278 harmonic complexity, however the medium and high complexity levels showed similar values  
279 (see Fig 2D). The ADC shows an inverted U-shaped pattern where the medium complexity  
280 chords have the highest value (see Fig S3). This is related to the fact that the ADC is dependent  
281 on the number of distinct notes in a harmonic set, thus there would be more potential for  
282 consonant intervals as the number of notes increases [32,49].

283

## 284 **Procedure**

285 Participants were recruited to visit a website hosting the survey via social media, email  
286 lists and word of mouth. Participants were offered the chance to win one of two Amazon gift  
287 cards worth 50 euros (or equivalent). First, participants completed a questionnaire regarding  
288 demographics, musical training, and musical preference. Participants reported how much formal  
289 training in music they had undergone, the age at which they began formal training, and how  
290 often they currently practiced. Information regarding participants' interest in groove music, how  
291 often they listen to groove music, their enjoyment of dancing and how often they dance, were  
292 collected as ratings on a five-point scale (see Fig S4 for results). All questions required an  
293 answer before proceeding.

294 Participants then heard two sequences similar to the stimuli used in the survey and were  
295 asked to adjust the volume on their computer to a comfortable level. They were told to maintain  
296 the chosen volume throughout the survey. The two sequences, which were not used in the actual

297 experiment, illustrated the range of possible levels of rhythmic and harmonic complexity. The  
298 survey then began during which each stimulus was presented once in a randomized order. After  
299 each stimulus was presented, two rating scales appeared for the two questions: ‘How much does  
300 this musical pattern make you want to move?’ and ‘How much pleasure do you experience  
301 listening to this musical pattern?’. Participants used their mouse to select their rating on the two  
302 five-point scales where one indicated ‘not at all/none’ and five indicated ‘very much/a lot’.  
303 Participants then pressed the ‘next’ button to start the next trial. Participants were not able to  
304 press ‘next’ until each stimulus had been presented in its entirety and a rating had been selected  
305 on both scales.

306

### 307 **Analysis**

308 Only data from participants who completed all 54 trials were saved. Therefore, the  
309 analysis was implemented with no missing values. As ratings regarding interest and frequency of  
310 listening to groove music were highly correlated ( $r(199) = .76$ , 95% CI [0.696, 0.814]), they  
311 were combined using a principle component analysis (PCA) and are henceforth referred to as  
312 groove engagement PCA. The PCA loadings were then included in the models instead of the raw  
313 ratings. The identical approach was taken with the two questions regarding whether participants  
314 enjoy dancing and how often they dance ( $r(199) = .63$ , 95% CI [0.533, 0.703]). This variable is  
315 henceforth referred to as dance PCA.

316 Analysis of the main effects and interactions of rhythmic and harmonic complexity, as  
317 well as the effects of musical training, and enjoyment of dancing and groove music, were carried  
318 out using linear mixed effects regression in *R* (version 3.4.1) and *RStudio* (version 1.0.143),  
319 using the *lme4* package [50]. Random intercepts for participants were included as well as by-

320 participant random slopes for the effects of rhythm and harmony. Therefore, inter-individual  
321 differences, not only in average rating (random intercepts), but also differences in how rhythmic  
322 and harmonic complexity affected participants' ratings (random slopes), were accounted for [51].  
323 In addition, by-item random intercepts were included, which account for differences in ratings  
324 among the versions of stimuli within each level of rhythmic and harmonic complexity. This also  
325 allowed for analysis of the raw rather than by-level aggregated ratings. Note that Figs 3 and 5  
326 show ratings aggregated within complexity level for visualization purposes.

327         A hierarchical approach was used, starting with an intercept-only model including all  
328 random effects. Predictors were then added incrementally and increases in model fit were  
329 assessed using the likelihood ratio test [52]. A final model including all significant predictors and  
330 random effects was then used to test follow up contrasts. Quadratic and pairwise contrasts were  
331 used to test whether rhythm and harmony exhibited quadratic trends and whether these trends  
332 differed across levels of the other predictors. Linear polynomial contrasts were not included as  
333 they are identical to the low versus high complexity contrast which was not of interest here.  
334 Contrasts were carried out using the emmeans package in *R* [53]. Confidence intervals were  
335 calculated using degrees of freedom approximated with the Satterthwaite method and were  
336 adjusted for multiple comparisons using the multivariate *t* method. As all contrasts involved  
337 comparing the estimates (*b*) to zero, confidence intervals not only reflect the precision of the  
338 estimate but also were used as two-tailed significance tests where an interval excluding zero  
339 indicates a significant result. Diagnostic plots of the residuals from all models were inspected for  
340 violations of the assumptions of normality and homoscedasticity. No violations were detected.

341         Linear regression models have been shown empirically to be robust to the potential  
342 violations of assumptions associated with Likert data [54]. However, many believe that

343 parametric statistics such as linear mixed effects models are not appropriate for Likert data and  
344 that non-parametric and/or approaches designed for ordinal data should be used [55]. However,  
345 cumulative link mixed models (CLMM; from the ordinal package in *R*) [56], which are a  
346 standard method for analyzing ordinal data in a mixed effects context, do not allow for by-  
347 participant random slopes and are therefore less generalizable than linear mixed effect models  
348 [51]. Furthermore, simulations suggests that CLMMs are more prone to Type I errors than linear  
349 mixed effects models for Likert data [57]. In the current study, secondary analyses were carried  
350 out using CLMMs in order to compare with the linear mixed effects approach. Overall the  
351 pattern of results was very similar for both types of models with slightly more statistically  
352 significant beta estimates in the CLMM models. Given their increased generalizability and  
353 potentially lower Type I error rates compared to CLMMs, only the results of the linear mixed  
354 effects models are reported here.

### 355 ***Mediation Analysis***

356 A mediation analysis was carried out to examine whether the effects of rhythmic and  
357 harmonic complexity on *wanting to move* were mediated by *pleasure*. This involved comparing  
358 two models predicting *wanting to move* ratings. The first model included rhythmic and harmonic  
359 complexity as predictors as well as the significant covariates from the main analysis. The second,  
360 mediation model was identical to the first model, with the addition of *pleasure* ratings as a  
361 predictor. If pleasure is a significant mediator, then the contributions of rhythmic and/or  
362 harmonic complexity will be reduced in the second model. It should be noted that we did not  
363 explicitly test the directionality of the relation between pleasure and wanting to move. However,  
364 given that there is evidence that harmony in particular leads to affective responses but no



365 evidence that harmony affects the desire to move, it seems reasonable that the relations follow  
366 the pathway from pleasure to wanting to move rather than vice versa.

367         The significance of the mediation effect was assessed using the mediation package [58]  
368 which provided point estimates and 95% confidence intervals for the mediation (indirect) and  
369 direct effects after taking the mediators' effects into account. Confidence intervals were  
370 calculated using a quasi-Bayesian Monte Carlo simulation with the number of simulations set to  
371 1000. The mediation package cannot accommodate models with maximal random effects  
372 structures therefore the models included a by-subject random intercept only. In addition, the  
373 mediation package cannot accommodate polynomial contrasts therefore only the medium versus  
374 high and medium versus low pairwise contrasts were tested.

### 375 ***Group Analysis***

376         An additional analysis was carried out to further examine the effect of musical training by  
377 comparing trained musicians with participants with little-to-no training (see Table 1 for musical  
378 background information). First, groove engagement and dance PCA loadings were compared  
379 between the musicians ( $n = 58$ ) and non-musicians ( $n = 51$ ). A linear mixed effects analysis  
380 tested the main effect of group, and its interactions with rhythmic and harmonic complexity, and  
381 groove engagement and dance PCA on both *wanting to move* and *pleasure* ratings.

382

## 383 **Results**

### 384 **Wanting to move**

385         For the *wanting to move* ratings, likelihood ratio tests that showed model fit was  
386 significantly improved by adding rhythmic complexity ( $\chi^2(2) = 280.46, p < .001$ ) and harmonic  
387 complexity ( $\chi^2(2) = 134.71, p < .001$ ). Follow-up contrasts showed that both rhythmic ( $b(197) =$

388 2.269, 95% CI [-2.530, -2.008]) and harmonic complexity ( $b(199) = -0.327$ , 95% CI [-0.434, -  
389 0.220]) showed significant quadratic trends, with rhythmic complexity showing a more  
390 pronounced trend. As can be seen in Fig 3A, low and medium complexity chords were rated  
391 similarly, with a drop in ratings for high complexity chords.

392 **Fig 3. Ratings as a function of complexity.** Boxplots showing the interaction between  
393 rhythmic and harmonic complexity for wanting to move ratings (A) and pleasure ratings (B).  
394 Boxplots represent ratings aggregated over items within each level of complexity for  
395 visualization purposes. Center line, median; box limits, upper and lower quartiles; whiskers, 1.5x  
396 interquartile range; points, outliers. Dots represent means calculated from the raw ratings.

397  
398 Likelihood ratio tests also showed a significant interaction between rhythmic and  
399 harmonic complexity ( $\chi^2(4) = 55.27$ ,  $p < .001$ ). Follow-up contrasts showed that the quadratic  
400 trend for rhythmic complexity was more pronounced when combined with medium harmonic  
401 complexity than high harmonic complexity ( $b(9840) = 0.201$ , 95% CI [-0.008, 0.409]). However,  
402 this difference did not reach statistical significance after correction for multiple comparisons.  
403 There was a smaller difference in the quadratic trend between medium and low complexity  
404 chords which was also not significant ( $b(9840) = 0.129$ , 95% CI [-0.079, 0.338]). Together, these  
405 results suggest that rhythmic complexity has a more pronounced inverted U-shaped relationship  
406 with *wanting to move* when combined with low and medium complexity chords compared to  
407 high complexity chords.

408 Dance PCA loadings showed a significant main effect ( $\chi^2(1) = 8.30$ ,  $p < .01$ ). Those with  
409 greater interest in dancing showed higher *wanting to move* ratings overall ( $b(194.91) = 0.106$ ,  
410 95% CI [0.027, 0.186]). There were also significant interactions between dance PCA loadings

411 and rhythmic complexity ( $\chi^2(2) = 6.97, p < .05$ ), years of formal music training and rhythmic  
412 complexity ( $\chi^2(2) = 10.66, p < .01$ ), and hours per week of practice and both rhythmic ( $\chi^2(2) =$   
413  $8.72, p < .05$ ) and harmonic complexity ( $\chi^2(2) = 10.22, p < .01$ ). However, using the final model  
414 to test follow-up contrasts revealed no significant effects involving these interactions after  
415 correcting for multiple comparisons.

416

### 417 **Pleasure**

418 For *pleasure* ratings, a likelihood ratio test revealed that there was a main effect of  
419 rhythmic complexity ( $\chi^2(2) = 227.49, p < .001$ ). When harmonic complexity was added, the  
420 model failed to converge (Barr et al., 2013). Therefore, the main effect of harmonic complexity  
421 was added at the same step as the harmony by rhythm interaction, which together significantly  
422 improved model fit ( $\chi^2(6) = 295.69, p < .001$ ). Follow-up contrasts showed that both rhythmic  
423 ( $b(197) = -1.673, 95\% \text{ CI } [-1.905, -1.442]$ ) and harmonic complexity ( $b(198) = -0.546, 95\% \text{ CI}$   
424  $[-0.688, -0.405]$ ) showed significant quadratic trends. As in the *wanting to move* results, rhythm  
425 showed a pronounced inverted U shape, whereas low and medium complexity chords were rated  
426 similarly and with a drop in ratings for high complexity chords (see Fig 3B).

427 Follow-up contrasts for the rhythm by harmony interaction showed that the quadratic  
428 trend for rhythmic complexity was significantly more pronounced for medium than high  
429 complexity chords ( $b(9840) = 0.345, 95\% \text{ CI } [0.131, 0.559]$ ). There was a smaller, non-  
430 significant difference in the trend between medium and low complexity chords ( $b(9840) = 0.138,$   
431  $95\% \text{ CI } [-0.075, 0.352]$ ). Therefore, like the *wanting to move* results but more prominent, the  
432 inverted U relationship between rhythm complexity and *pleasure* was more pronounced for low  
433 and medium complexity chords compared to high complexity chords.

434 Likelihood ratio test showed significant interactions between hours of weekly practice  
435 and both rhythmic ( $\chi^2(2) = 14.63, p < .001$ ) and harmonic complexity ( $\chi^2(2) = 12.04, p < .01$ ).  
436 There was a significant interaction between dance PCA loadings and rhythmic complexity ( $\chi^2(2)$   
437  $= 7.16, p < .05$ ). When adding groove engagement PCA loadings, the model failed to converge,  
438 therefore, groove engagement PCA loadings were added at the same step as the rhythm by  
439 groove engagement PCA interaction, which increased model fit ( $\chi^2(3) = 8.81, p = .03$ ). There  
440 was also a significant interaction between groove engagement PCA loadings and harmonic  
441 complexity ( $\chi^2(2) = 6.73, p < .05$ ). However, using the final model to test follow-up contrasts  
442 revealed no significant effects involving these main effects or interactions after correcting for  
443 multiple comparisons.

444

#### 445 **Mediation Analysis**

446 Two models predicting *wanting to move* ratings were used to test whether pleasure  
447 mediated the effect of harmonic and rhythmic complexity on wanting to move. The first model  
448 included all the significant covariates and interactions from the main analysis (rhythm, harmony,  
449 Dance PCA, years of music training and hours per week of practice), and the second, mediation  
450 model was identical to the first with the addition of pleasure ratings as a predictor.

451 For rhythmic complexity, *pleasure* ratings had a significant mediation effect while the  
452 direct effect of rhythmic complexity was also significant. Both effects are evident in that the  
453 difference in *wanting to move* ratings between medium and low rhythmic complexity was  
454 significant in both the first model ( $b(1592) = 0.672, 95\% \text{ CI } [0.585, 0.759]$ ) and reduced, but still  
455 significant in the mediation model ( $b(1634.9) = 0.294, 95\% \text{ CI } [0.227, 0.361]$ ) showing the  
456 remaining direct effect. The reduction of the effect from the first to the mediation model was

457 itself significant ( $b = 0.378$ , 95% CI [0.329, 0.430]), suggesting *pleasure* had a mediating effect.  
458 The difference in ratings between the medium and high complexity rhythms showed the same  
459 pattern. The difference was smaller in the mediation model ( $b(1729.54) = 0.821$ , 95% CI [0.741,  
460 0.900]) compared to the initial model ( $b(1592) = 1.60$ , 95% CI [1.510, 1.684]), and this decrease  
461 was significant ( $b = 0.777$ , 95% CI [0.718, 0.840]). Therefore, for both the medium versus low  
462 and medium versus high rhythm complexity contrasts, *pleasure* showed a significant mediation  
463 effect, while the direct effect remained significant.

464 For harmonic complexity, the difference in ratings between medium and low complexity  
465 chords was not significant in the initial model ( $b(1592) = 0.012$ , 95% CI [-0.075, 0.099]) or the  
466 mediation model ( $b(1591.03) = 0.019$ , 95% CI [-0.044, 0.081]). For the medium minus high  
467 harmonic complexity contrast, *pleasure* was a significant mediator as the contrast was significant  
468 in the first model ( $b(1592) = 0.339$ , 95% CI [0.252, 0.426]) and not in the mediation model  
469 ( $b(1633.31) = -0.031$ , 95% CI [-0.098, 0.036]), therefore no direct effect remained. The  
470 mediating effect of *pleasure* ratings was significant ( $b = 0.371$ , 95% CI [0.323, 0.420]).

471 These results, summarized in Fig 4, show that *pleasure* ratings fully mediated the effect  
472 of harmonic complexity on *wanting to move* ratings. However, *pleasure* only partially mediated  
473 the effect of rhythmic complexity on *wanting to move* ratings such that a direct effect of  
474 rhythmic complexity remained.

475

476 **Fig 4. Path model.** Path model based on the mediation analysis showing the relations between  
477 the predictors – rhythmic and harmonic complexity; the mediator – pleasure ratings; and the  
478 outcome variable – wanting to move ratings. Regression estimates for the effects of rhythmic and  
479 harmonic complexity on wanting to move ratings are from the mediation model that takes into

480 account the effect of pleasure ratings on wanting to move ratings. The dashed line indicates that  
481 the direct effect of the medium – high harmonic complexity contrast was no longer significant  
482 once pleasure ratings were included in the model. L = Low, M = Medium, H = High; \*  $p < .05$ .

483

#### 484 **Musician vs non-musicians**

485 Dance PCA loadings were not significantly different between groups ( $b(106.31) = 0.324$ ,  
486 95% CI [-0.257, 0.906]), nor were groove engagement PCA loadings ( $b(105.61) = -0.099$ , 95%  
487 CI [-0.675, 0.477]).

#### 488 ***Wanting to move***

489 There was no significant main effect of group ( $\chi^2(1) = 0.25, p > .05$ ), but there was a  
490 significant interaction between group and rhythmic complexity ( $\chi^2(2) = 7.47, p < .05$ ) on *wanting*  
491 *to move* ratings. A follow-up contrast showed that the quadratic trend for rhythmic complexity  
492 was more pronounced for musicians than non-musicians ( $b(103) = 0.780$ , 95% CI [0.105, 1.456];  
493 see Fig 5A). There was no significant three-way interaction between group, rhythmic and  
494 harmonic complexity. Although there were significant three-way interactions between group,  
495 rhythmic complexity and both dance PCA loadings ( $\chi^2(4) = 11.14, p < .05$ ) and groove  
496 engagement PCA loadings ( $\chi^2(4) = 11.03, p < .05$ ), follow up contrasts corrected for multiple  
497 comparisons revealed no main effects or interactions.

#### 498 ***Pleasure***

499 There was a significant effect of group ( $\chi^2(1) = 4.52, p < .05$ ) showing that musicians had  
500 higher *pleasure* ratings overall compared to non-musicians ( $b(107) = 0.227$ , 95% CI [0.023,  
501 0.431]; see Fig 5B).

502

503 **Fig 5. Ratings as a function of musical training.** A) Box plot showing the interaction between  
504 group and rhythmic complexity. Lines represent means calculated from raw ratings. B) Box plot  
505 the effect of musical training on pleasure ratings. Boxplots represent ratings aggregated over  
506 items within each level of complexity for visualization purposes. Center line, median; box limits,  
507 upper and lower quartiles; whiskers, 1.5x interquartile range; points, outliers. Dots represent  
508 means calculated from the raw ratings.

509

510

### Discussion

511 This study used ratings of *pleasure* and *wanting to move* to assess whether harmony and  
512 rhythm work together to affect the sensation of groove. Rhythm showed a strong inverted U-  
513 shaped relationship with both pleasure and wanting to move ratings. Harmony did not show an  
514 inverted U-shaped relationship as medium and low complexity chords were rated similarly.  
515 Rhythm and harmony interacted such that the inverted U-shaped pattern for rhythm was less  
516 prominent in the context of high compared to medium and low complexity chords, particularly  
517 for *pleasure* ratings. That is, high harmonic complexity not only reduced the sensation of groove  
518 overall but reduced the effect of rhythm complexity as well. Furthermore, the effect of harmony  
519 on wanting to move was strongly mediated by pleasure, while rhythm directly affected both  
520 wanting to move and pleasure. Together these results suggest that rhythm plays a primary role in  
521 generating the sensation of groove, with harmony providing a modulatory role through its effect  
522 on pleasure.

523 Importantly, musicians showed a stronger effect of rhythmic complexity on *wanting to*  
524 *move* ratings and higher *pleasure* ratings overall. Together these results show that musical  
525 training strengthens the connection between syncopation and the desire to move and leads to

526 greater reported pleasure. Finally, for all participants, interest in dance was associated with  
527 higher *wanting to move* ratings.

528 Consistent with the previous literature, rhythmic complexity showed an inverted U-  
529 shaped relationship with the sensation of groove such that medium levels of syncopation  
530 increased pleasure and desire to move compared to low and high levels [3,59]. Emotional and  
531 embodied responses to music have long been thought to result from predictive processes  
532 whereby listeners develop internal models, or musical expectancies, based on prior experience  
533 [18–20]. The strongest responses arise when listeners can make predictions, but expectancies are  
534 subtly violated, creating a balance between predictability and uncertainty [60]. According to the  
535 predictive coding framework, medium levels of syncopation achieve this balance by creating an  
536 optimal level of tension between a predictive model – the meter – and the current sensory input –  
537 the rhythm [40,61,62]. If the rhythm is too complex, no model of the meter can be established  
538 and if it is too simple, there is no tension. This tension has been hypothesized to increase  
539 pleasure because it engenders prediction errors, or violations of expectations, which are  
540 rewarding as they lead to further predictions and thus learning [62]. The desire to move is  
541 highest for medium syncopation because the tension between model and input encourages the  
542 listener to reinforce this model by synchronizing their movements which fills in the gaps in the  
543 rhythmic surface created by syncopations [63]. Movement may also be a way for listeners to test  
544 their model of the meter [64].

545 While it is not yet clear how pleasure and desire to move interact to create the sensation  
546 of groove, theories of entrainment offer promising hypotheses. Motor brain regions are important  
547 for beat perception [65–68] and entrainment of activity in motor and auditory regions to  
548 rhythmic stimuli drive auditory temporal predictions [69], as well as meter and beat perception



549 [70–73]. Motor regions may also be involved in the affective response to music as they show  
550 increased activity for preferred over non-preferred rhythms [74] and during music-induced  
551 affective responses [75]. Finally, motor cortical excitability has been shown to increase when  
552 people listened to high groove music [38]. More generally, feelings of entrainment also predict  
553 positive affective responses to music [76]. This is in line with the idea that entrainment at neural,  
554 cognitive, physiological, and social levels results in a positive affective response [77]. In the  
555 current study, medium complexity rhythms may have engendered greater entrainment at one or  
556 more of these levels resulting in increased pleasure and desire to move. It is also possible that  
557 familiarity may have contributed to the U-shaped relationship observed here because the medium  
558 complexity rhythms consist of son and rumba claves that are common to many types of popular  
559 music. However, the stimuli used here were entirely novel, and therefore would not be  
560 individually recognizable.

561       Compared to rhythm complexity, harmonic complexity showed a less marked U-shaped  
562 pattern for both wanting to move and pleasure, because low and medium complexity chords were  
563 rated similarly. This may be because low and medium complexity chords are both relatively  
564 common in groove music, and thus did not differ in pleasure. In contrast, high complexity chords  
565 are uncommon, and thus were not only perceived as unpleasant but violated expectations,  
566 resulting in a strong negative effect on both pleasure and the desire to move. In addition, based  
567 on our findings, rhythmic features appear to dominate for these stimuli, which may have reduced  
568 the attention paid to harmonic complexity. Another possibility is that the range of harmonic  
569 complexity was not large enough to capture an inverted U-shaped relationship. Lower  
570 complexity chords, in this case the octave, may lead to lower ratings than the low complexity  
571 chords used here.

572 High complexity chords attenuated the effect of rhythm complexity on the sensation of  
573 groove. This attenuation was significant for pleasure and only near-significant for wanting to  
574 move ratings which, combined with the results of the mediation analysis, suggests that harmony  
575 primarily affects the pleasure component of groove. These effects may be due to a shared  
576 internal model that generates predictions about both the timing and harmonic content of future  
577 events. Behavioural evidence for a shared model is found in a study showing more accurate pitch  
578 judgements for rhythmically expected tones [78]. In addition, neural beta oscillations entrained  
579 to a rhythmic stimulus are sensitive to violations of both rhythmic [79] and pitch expectations  
580 [80]. Shared internal models enhance predictive processing [69], however violations of one  
581 component of the model likely affect the other. As discussed above, high complexity chords  
582 violate harmonic expectations, which may disrupt the shared model and increase the disparity  
583 between model and sensory input, thus reducing pleasure and the desire to move.

584 As discussed above, pleasurable states are thought to facilitate entrainment at various  
585 levels [77]. According to this view, harmonic complexity may affect the degree of entrainment at  
586 one or more of these levels via its influence on pleasure. This is in line with the result that  
587 pleasure ratings strongly mediated the effect of harmonic complexity on wanting to move  
588 ratings. This suggests that harmonic complexity does not directly influence the desire to move  
589 and instead affects the experienced pleasure, which in turn affects the desire to move. The effect  
590 of harmony on pleasure may therefore influence the degree of entrainment, thus affecting the  
591 desire to move while also modulating the effect of rhythm complexity. Support for this  
592 hypothesis comes from work showing that auditory-motor synchronization was reduced for  
593 dissonant compared to consonant tones [26] and that consonant music generated greater feelings  
594 of entrainment [27]. Conversely, feelings of entrainment have also been found to enhance

595 pleasure [76]. We hypothesize that the desire to move and pleasure associated with groove are  
596 reciprocal and based on interactions between predictive and entrainment processes in the  
597 auditory, motor, and reward systems.

598         Compared to non-musicians, musicians showed a more prominent inverted U-shaped  
599 relationship between rhythm and wanting to move. Musical training may lead to an increased  
600 awareness and appreciation of syncopation and its effect on the desire to move. For example,  
601 musicians have been shown to use syncopation intentionally to convey groove [10] and musical  
602 expertise has been positively linked with the effect of syncopation on groove ratings [39]. In  
603 addition, musical training may lead to more developed internal models that lead to stronger  
604 rhythmic expectations. This is supported by studies showing that musicians have greater error-  
605 related neural responses to rhythmic violations [40] and enhanced neural entrainment to natural  
606 music [81]. An increase in motor-based processing may also account for the greater effect of  
607 rhythm on wanting to move in musicians [37,38]. Consistent with previous work [3], enjoyment  
608 and interest in dancing was also associated with higher wanting to move ratings overall. This  
609 further supports the link between motor processes and groove-based music in those with strong  
610 associations between music and movement.

611         The musician group also showed greater overall pleasure ratings compared to non-  
612 musicians. This is consistent with evidence that musicians demonstrate greater enjoyment of and  
613 increased neural reward activity for a range of musical stimuli [24,35,36]. Some studies have  
614 shown no effect of musicianship [3], or reduced groove ratings in musicians [25]. However,  
615 these studies defined musicianship less strictly, thus perhaps attenuating the effects of training-  
616 based internal models or expectancies on the sensation of groove.

617           We have shown that rhythm and harmony interact in the sensation of groove. While  
618 rhythmic complexity is the primary driver, harmony both modulates the effect of rhythm and  
619 makes a unique contribution via its effect on pleasure. These results can be accounted for by  
620 predictive processes based on rhythmic and harmonic expectancies. Syncopated rhythms create  
621 the optimal level of tension between expectancy and violation which increases pleasure and the  
622 desire to move. Harmonic expectancies also affect pleasure, and by influencing emotional  
623 valence, enhance the effects of rhythm. Musical expectancies are encoded in auditory-motor  
624 networks and influenced by experience, which may account for the increased sensitivity to  
625 groove in those with strong associations between movement and music. Taken together, this  
626 work provides important new information about the role of prediction in the experience of  
627 musical pleasure. These findings may also contribute to the development of more effective and  
628 enjoyable music-based interventions.

629

### 630 ***Data Availability***

631           The ratings and background data that support these findings are available in the Open  
632 Science Framework with identifier link: DOI 10.17605/OSF.IO/76ZWY

633

### 634 **Supporting Information**

635

636 **Table S1. Musical Background.** (DOCX)

637

638 **Fig S1. Bar plots of demographic information.** (A) Number of participants in from each  
639 continent; AF, Africa; AS, Asia; EU, Europe; NA, North America; OC, Oceania; SA, South

640 America. (B) Number of participants with each type of degree in music; Bach, Bachelors. (C)  
641 Type of instrument played musicians; DJ/Prod, DJ/Producer. (D) Genre played by musicians;  
642 D/E, Dance/Electronic; Exp, Experimental; N-W, non-western. (DOCX)

643

644 **Fig S2. Bar plots of groove and dance questions.** Questions regarding groove (A and B);  
645 Questions regarding music and dancing (C and D). (DOCX)

646

647 **Fig S3. Schematic representation of rhythms used to create the stimuli.** Weights represent  
648 weights used to calculate the syncopation index. Medium 1 = Son clave, Medium 2 = Rumba  
649 clave. (DOCX)

650

651 **Fig S4. Chords used in the stimuli.** a) low harmonic complexity, b) medium complexity chords,  
652 c) high complexity chords. DOCX

653

654 **Fig S5. Additional indices of harmonic complexity.** (A) Mean roughness, and (B) ADC indices  
655 for the chords used in the stimuli.

656

## 657 **Acknowledgements**

658 The authors thank Alessandra Brusa for help with the dissemination of the survey. They  
659 also thank Gabe Nespoli for analysis suggestions and Elvira Brattico for practical help and  
660 advice.

661

## 662 **Author Contributions**

663 Conceptualization: TM, MW, PV, VP. Data Curation: OH, TM, MW. Formal Analysis: TM.  
664 Funding Acquisition: TM, PV, VP. Investigation: TM, MW, OH. Methodology: TM, MW.  
665 Project Administration: TM, MW. Resources: OH, PV. Software: OH, TM, MW. Supervision:  
666 TM, MW. Validation: TM. Visualization: TM. Writing – Original Draft Preparation: TM.  
667 Writing – Review & Editing: TM, MW, PV, VP.

668

669

670

671

672

673

674

675

676

677

678

679

680

681

682

683

684

685

686

687

## Bibliography

- 688 1. Janata P, Tomic ST, Haberman JM. Sensorimotor coupling in music and the psychology  
689 of the groove. *J Exp Psychol Gen.* 2012;141(1):54–75.
- 690 2. Witek MAG. Groove experience: Emotional and physiological responses to groove-based  
691 music. In: *Proceedings of the 7th Triennial Conference of European Society for the*  
692 *Cognitive Sciences of Music (ESCOM 2009) Jyväskylä, Finland.* 2009. p. 573–82.
- 693 3. Witek MAG, Clarke EF, Wallentin M, Kringelbach ML, Vuust P. Syncopation, body-  
694 movement and pleasure in groove music. *PLoS One.* 2014;9(4):1–12.
- 695 4. Pallesen KJ, Brattico E, Bailey C, Korvenoja A, Koivisto J, Gjedde A, et al. Emotion  
696 processing of major, minor, and dissonant chords: A functional magnetic resonance  
697 imaging study. *Ann N Y Acad Sci.* 2005;1060:450–3.
- 698 5. Madison G. Experiencing Groove Induced by Music: Consistency and Phenomenology.  
699 *Music Percept.* 2006;24(2):201–8.
- 700 6. Pressing J. Black atlantic rhythm: Its computational and transcultural foundations. *Music*  
701 *Percept.* 2002;19(3):285–310.
- 702 7. Madison G, Gouyon F, Ullén F. Musical groove is correlated with properties of the audio  
703 signal as revealed by computational modelling, depending on musical style. In:  
704 *Proceedings of the SMC 2009 - 6th Sound and Music Computing Conference.* 2009. p.  
705 239–40.
- 706 8. Madison G, Gouyon F, Ullén F, Hörnström K. Modeling the tendency for music to induce  
707 movement in humans: First correlations with low-level audio descriptors across music  
708 genres. *J Exp Psychol Hum Percept Perform.* 2011;37:1578–1594.

- 709 9. Burger B, Thompson MR, Luck G, Saarikallio S, Toiviainen P. Influences of rhythm- and  
710 timbre-related musical features on characteristics of music-induced movement. *Front*  
711 *Psychol.* 2013;4(183):1–10.
- 712 10. Madison G, Sioros G. What musicians do to induce the sensation of groove in simple and  
713 complex melodies, and how listeners perceive it. *Front Psychol Audit Cogn Neurosci.*  
714 2014;5(894):1–14.
- 715 11. Davies M, Madison G, Silva P, Gouyon F. The Effect of Microtiming Deviations on the  
716 Perception of Groove in Short Rhythms. *Music Percept An Interdiscip J.* 2013;30(5):497–  
717 510.
- 718 12. Etani T, Marui A, Kawase S, Keller PE, Madison G. Optimal Tempo for Groove : Its  
719 Relation to Directions of Body Movement and Japanese nori. *Front Psychol.*  
720 2018;9(462):1–13.
- 721 13. Kilchenmann L, Senn O. Microtiming in Swing and Funk affects the body movement  
722 behavior of music expert listeners. *Front Psychol.* 2015;6(1232):1–14.
- 723 14. Danielsen A. *Presence and Pleasure. The Funk Grooves of James Brown and Parliament.*  
724 Middletown, CT: Wesleyan University Press; 2006.
- 725 15. Greenwald J. Hip-Hop drumming: The rhyme may define, but the groove makes you  
726 move. *Black Music Res J.* 2002;22(2):259–71.
- 727 16. Fitch WT, Rosenfeld AJ. Perception and production of syncopated rhythms. *Music*  
728 *Percept An Interdiscip J.* 2007;25(1):43–58.
- 729 17. Longuet-Higgins HC, Lee CS. The Rhythmic Interpretation of Monophonic Music. *Music*  
730 *Percept An Interdiscip J.* 1984;1(4):424–41.
- 731 18. Huron D. *Sweet Anticipation: Music and the Psychology of Expectation.* MIT Press.



- 732 Cambridge, MA; 2006.
- 733 19. Meyer LB. *Emotion and Meaning in Music*. Chicago: University of Chicago Press; 1956.
- 734 20. London J. *Hearing in Time*. New York: Oxford University Press; 2012.
- 735 21. Keller P, Schubert E. Cognitive and affective judgements of syncopated musical themes.
- 736 *Adv Cogn Psychol*. 2011;7(1):142–56.
- 737 22. Stupacher J, Hove MJ, Janata P. Audio features underlying perceived groove and
- 738 sensorimotor synchronization in music. *Music Percept*. 2016;33(5):571–89.
- 739 23. Arthurs Y, Beeston A V., Timmers R. Perception of Isolated Chords: Examining
- 740 Frequency of Occurrence, Instrumental Timbre, Acoustic Descriptors and Musical
- 741 Training. *Psychol Music*. 2017;26(1).
- 742 24. Lahdelma I, Eerola T. Single chords convey distinct emotional qualities to both naive and
- 743 expert listeners. *Psychol Music*. 2014;44(1):37–54.
- 744 25. Hurley BK, Martens PA, Janata P. Spontaneous sensorimotor coupling with multipart
- 745 music. *J Exp Psychol Hum Percept Perform*. 2014;40(4):1679–96.
- 746 26. Komeilipour N, Rodger MWM, Craig CM, Cesari P. (Dis-)Harmony in movement: effects
- 747 of musical dissonance on movement timing and form. *Exp Brain Res*. 2015;233(5):1585–
- 748 95.
- 749 27. Trost W, Frühholz S, Schön D, Labbé C, Pichon S, Grandjean D, et al. Getting the beat:
- 750 Entrainment of brain activity by musical rhythm and pleasantness. *Neuroimage*.
- 751 2014;103:55–64.
- 752 28. Cazden N. The Systemic Reference of Musical Consonance Response. *Int Rev Aesthet*
- 753 *Sociol Music*. 1972;3(2):217–45.
- 754 29. Johnson-Laird PN, Kang OE, Chang LY. On Musical Dissonance. *Music Percept An*

- 755 Interdiscip J. 2012;30(1):19–35.
- 756 30. Mcdermott JH, Lehr AJ, Oxenham AJ. Individual Differences Reveal the Basis of  
757 Consonance. *Curr Biol*. 2010;20(11):1035–41.
- 758 31. Parncutt R, Hair G. Consonance and dissonance in music theory and psychology:  
759 Disentangling dissonant dichotomies. *J Interdiscip Music Stud*. 2011;5(2):119–166.
- 760 32. Lahdelma I, Eerola T. Mild Dissonance Preferred Over Consonance in Single Chord  
761 Perception. *Iperception*. 2016;7(3):1–21.
- 762 33. Berlyne DE. *Aesthetics and Psychobiology*. East Norwalk, CT: Appleton-Century-Crofts;  
763 1971.
- 764 34. Orr MG, Ohlsson S. Relationship between complexity and liking as a function of  
765 expertise. *Music Percept An Interdiscip J*. 2005;22(4):583–611.
- 766 35. Chapin H, Jantzen K, Kelso JAS, Steinberg F, Large E. Dynamic emotional and neural  
767 responses to music depend on performance expression and listener experience. *PLoS One*.  
768 2010;5(12):1–14.
- 769 36. Alluri V, Brattico E, Toiviainen P, Burunat I, Bogert B, Numminen J, et al. Musical  
770 expertise modulates functional connectivity of limbic regions during continuous music  
771 listening. *Psychomusicology*. 2015;25(4):443–54.
- 772 37. Alluri V, Toiviainen P, Burunat I, Kliuchko M, Vuust P, Brattico E. Connectivity patterns  
773 during music listening: Evidence for action-based processing in musicians. *Hum Brain*  
774 *Mapp*. 2017;38(6):2955–70.
- 775 38. Stupacher J, Hove MJ, Novembre G, Schütz-Bosbach S, Keller PE. Musical groove  
776 modulates motor cortex excitability: A TMS investigation. *Brain Cogn*. 2013;82:127–36.
- 777 39. Senn O, Kilchenmann L, Bechtold T, Hoesl F. Groove in drum patterns as a function of

- 778 both rhythmic properties and listeners' attitudes. PLoS One. 2018;13(6):1–33.
- 779 40. Vuust P, Ostergaard L, Pallesen KJ, Bailey C, Roepstorff A. Predictive coding of music -  
780 Brain responses to rhythmic incongruity. Cortex. 2009;45(1):80–92.
- 781 41. Brattico E, Pallesen KJ, Varyagina O, Bailey C, Anourova I, Ja M, et al. Neural  
782 Discrimination of Nonprototypical Chords in Music Experts and Laymen: An MEG  
783 Study. J Cogn Neurosci. 2008;21(11):2230–44.
- 784 42. Povel D, Essens P. Perception of Temporal Patterns. JSTOR. 1985;2(4):411–40.
- 785 43. Freeman B, Pease T. Arranging 2 Workbook. Boston, MA: Berklee College of Music;  
786 1989.
- 787 44. Levine M. The Jazz Theory Book. O'Reilly Media, Inc; 2011.
- 788 45. Nettles B, Ulanowsky A. Harmony 1-4. Boston, MA: Berklee College of Music; 1987. 33-  
789 35 p.
- 790 46. Lartillot O, Toiviainen P, Eerola T. A Matlab Toolbox for Music Information Retrieval.  
791 Data Anal Mach Learn Appl. 2007;261–8.
- 792 47. Plomp R, Levelt JM. Tonal consonance and critical bandwidth. J Acoust Soc Am.  
793 1965;38(4):548–60.
- 794 48. Sethares WA. Tuning , Timbre , Spectrum , Scale. Springer Science and Business Media;  
795 2004. 1-37 p.
- 796 49. Huron D. Interval-Class Content in Equally Tempered Sets: Common Scales Exhibit  
797 Optimum Tonal Consonance. Music Percept An Interdiscip J. 1994;11(3):289–305.
- 798 50. Bates DM, Maechler M, Bolker B, Walker S. Fitting linear mixed-effects models using  
799 lme4. J Stat Softw. 2015;67:1–48.
- 800 51. Barr DJ, Levy R, Scheepers C, Tily HJ. Random effects structure for confirmatory

- 801 hypothesis testing: Keep it maximal. *J Mem Lang*. 2013;68(3):255–78.
- 802 52. Baayen RH, Davidson DJ, Bates DM. Mixed-effects modeling with crossed random  
803 effects for subjects and items. *J Mem Lang*. 2008;59(4):390–412.
- 804 53. Lenth R, Singmann H, Love J, Buerkner P, Herve M. Package “emmeans”. Vol. 34. 2018.  
805 p. 126.
- 806 54. Norman G. Likert scales, levels of measurement and the “laws” of statistics. *Adv Heal  
807 Sci Educ*. 2010;15(5):625–32.
- 808 55. Jamieson S. Likert scales: how to (ab)use them. *Med Educ*. 2004;38:1212–8.
- 809 56. Christensen R. Analysis of ordinal data with cumulative link models—estimation with the  
810 R-package ordinal. R-package version. 2015;1–31.
- 811 57. Kizach J. Analyzing Likert-scale data with mixed-effects linear models - a simulation  
812 study. Poster Present Linguist Evidence, Tübingen, Ger. 2014;
- 813 58. Tingley D, Yamamoto T, Hirose K, Keele L, Kosuke I. mediation : R Package for Causal  
814 Mediation Analysis. *J Stat Softw*. 2014;59(5):1–38.
- 815 59. Sioros G, Mirron M, Davies M, Gouyon F, Madison G. Syncopation creates the sensation  
816 of groove in synthesized music examples. *Front Psychol*. 2014;5(1036):1–10.
- 817 60. Salimpoor VN, Zald DH, Zatorre RJ, Dagher A, McIntosh AR. Predictions and the brain:  
818 how musical sounds become rewarding. *Trends Cogn Sci*. 2014;1–6.
- 819 61. Vuust P, Witek M, Dietz M, Kringelbach ML. Now You Hear It: A novel predictive  
820 coding model for understanding rhythmic incongruity. *Ann N Y Acad Sci*. 2018;1–11.
- 821 62. Vuust P, Witek MAG. Rhythmic complexity and predictive coding: A novel approach to  
822 modeling rhythm and meter perception in music. *Front Psychol*. 2014;5(1111):1–14.
- 823 63. Witek MAG. Filling in: Syncopation, pleasure and distributed embodiment in groove.

- 824 Music Anal. 2017;36(1):138–60.
- 825 64. Patel AD, Iversen JR. The evolutionary neuroscience of musical beat perception: The  
826 Action Simulation for Auditory Prediction (ASAP) hypothesis. *Front Syst Neurosci.*  
827 2014;8(57):1–14.
- 828 65. Bengtsson SL, Ullen F, Henrik Ehrsson H, Hashimoto T, Kito T, Naito E, et al. Listening  
829 to rhythms activates motor and premotor cortices. *Cortex.* 2009;45(1):62–71.
- 830 66. Chen JL, Penhune VB, Zatorre RJ. Moving on time: brain network for auditory-motor  
831 synchronization is modulated by rhythm complexity and musical training. *J Cogn*  
832 *Neurosci.* 2008;20(2):226–39.
- 833 67. Grahn JA, Rowe JB. Feeling the beat: premotor and striatal interactions in musicians and  
834 nonmusicians during beat perception. *J Neurosci [Internet].* 2009;29(23):7540–8.
- 835 68. Grahn J a, Brett M. Rhythm and beat perception in motor areas of the brain. *J Cogn*  
836 *Neurosci.* 2007;19(5):893–906.
- 837 69. Morillon B, Schroeder CE. Neuronal oscillations as a mechanistic substrate of auditory  
838 temporal prediction. *Ann N Y Acad Sci.* 2015;1337:26–31.
- 839 70. Fujioka T, Ross B, Trainor LJ. Beta-Band Oscillations Represent Auditory Beat and Its  
840 Metrical Hierarchy in Perception and Imagery. *J Neurosci.* 2015;35(45):15187–98.
- 841 71. Large EW, Snyder JS. Pulse and meter as neural resonance. *Ann N Y Acad Sci.*  
842 2009;1169:46–57.
- 843 72. Nozaradan S, Peretz I, Keller PE. Individual differences in rhythmic cortical entrainment  
844 correlate with predictive behavior in sensorimotor synchronization. *Sci Rep.*  
845 2016;6(20612):1–12.
- 846 73. Tal I, Large EW, Rabinovitch E, Wei Y, Schroeder CE, Poeppel D, et al. Neural

- 847 entrainment to the beat: The “Missing-Pulse” phenomenon. *J Neurosci*.  
848 2017;37(26):6331–41.
- 849 74. Kornysheva K, Cramon DY Von, Jacobsen T. Tuning-in to the Beat: Aesthetic  
850 Appreciation of Musical Rhythms Correlates with a Premotor Activity Boost. *Hum Brain*  
851 *Mapp*. 2010;31:48–64.
- 852 75. Blood AJ, Zatorre RJ. Intensely pleasurable responses to music correlate with activity in  
853 brain regions implicated in reward and emotion. *Proc Natl Acad Sci U S A*. 2001  
854 25;98(20):11818–23.
- 855 76. Labbé C, Grandjean D. Musical emotions predicted by feelings of entrainment. *Music*  
856 *Percept*. 2014;32(2):170–85.
- 857 77. Trost WJ, Labbé C, Grandjean D. Rhythmic entrainment as a musical affect induction  
858 mechanism. *Neuropsychologia*. 2017;96:96–110.
- 859 78. Jones MR, Moynihan H, Mackenzie N, Puente J. Temporal aspects of stimulus-driven  
860 attending in dynamoc arrays. *Psychol Sci*. 2002;13(4):313–9.
- 861 79. Fujioka T, Trainor LJ, Large EW, Ross B. Beta and gamma rhythms in human auditory  
862 cortex during musical beat processing. *Ann N Y Acad Sci*. 2009;1169:89–92.
- 863 80. Chang A, Bosnyak DJ, Trainor LJ. Unpredicted pitch modulates beta oscillatory power  
864 during rhythmic entrainment to a tone sequence. *Front Psychol*. 2016;7(327):1–13.
- 865 81. Doelling KB, Poeppel D. Cortical entrainment to music and its modulation by expertise.  
866 *Pnas*. 2015;1–10.

867

868

869

870

871

♩ = 96

The image shows a musical score for piano and drums. At the top, a tempo marking indicates a quarter note equals 96 beats per minute (♩ = 96). The score is written in common time (C) and consists of three staves. The top staff is for the drum set, marked with a double bar line and a common time signature. It features a series of 'x' marks above the staff, indicating drum hits, with a thick black bar below the staff showing the timing of these hits. The middle and bottom staves are for the piano, with a treble and bass clef respectively, and a common time signature. The piano part features a melody of eighth notes in the treble clef and a bass line in the bass clef. The bass line starts with a sharp sign (#) on the first note. The piano part includes various musical notations such as eighth notes, beamed eighth notes, and rests.

# Rhythm indices

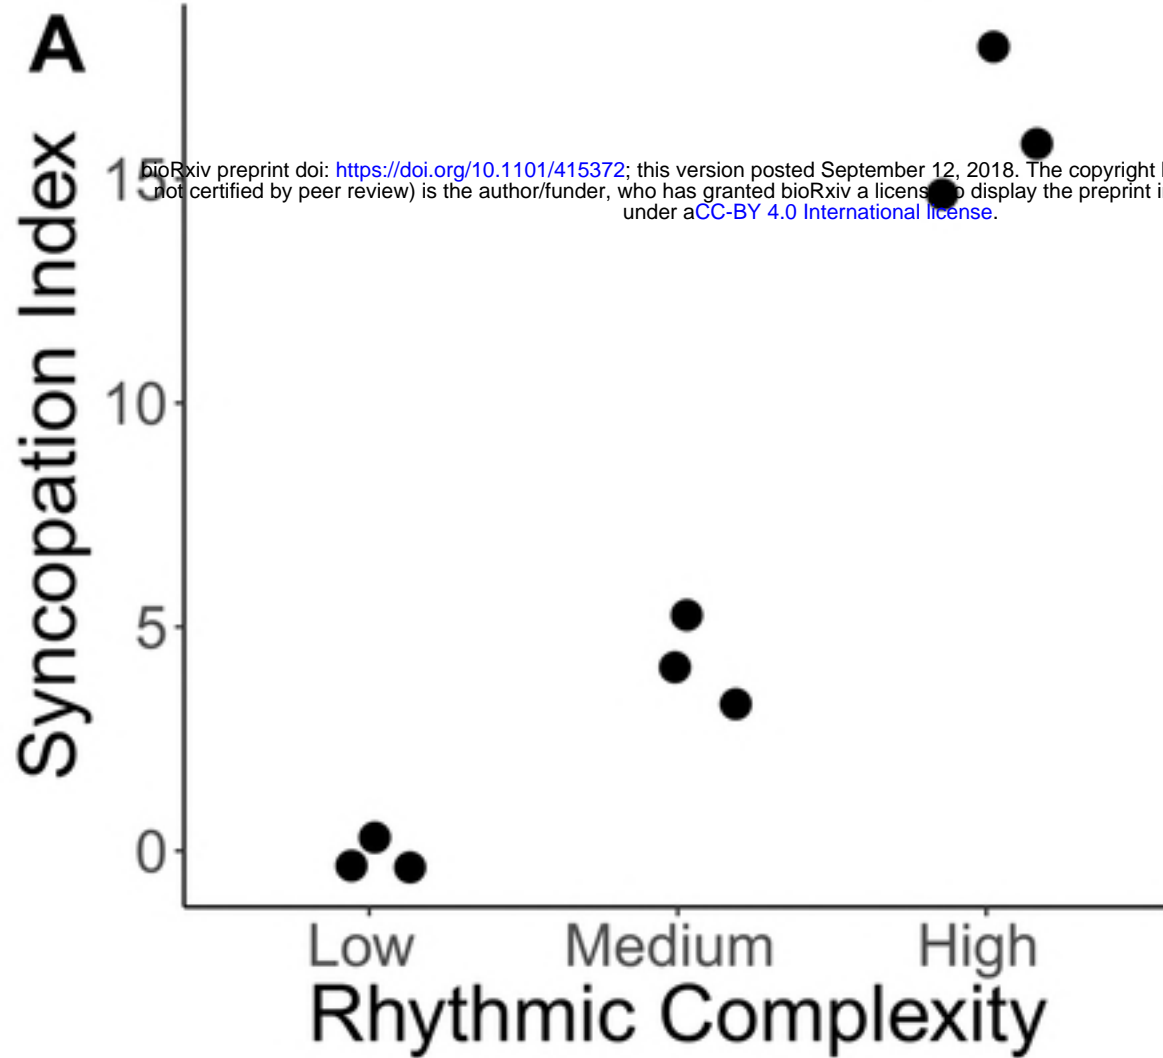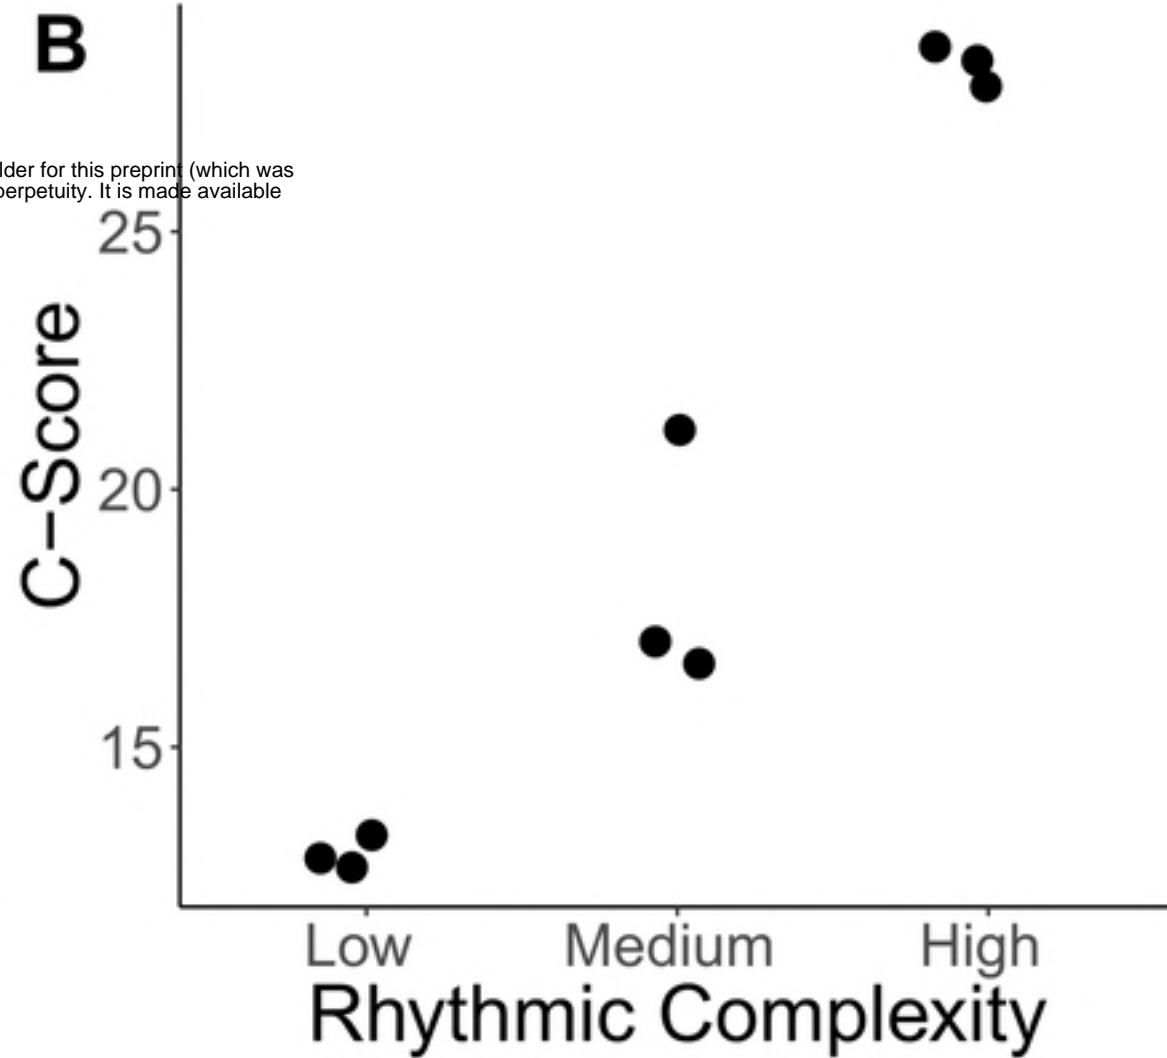

# Harmony indices

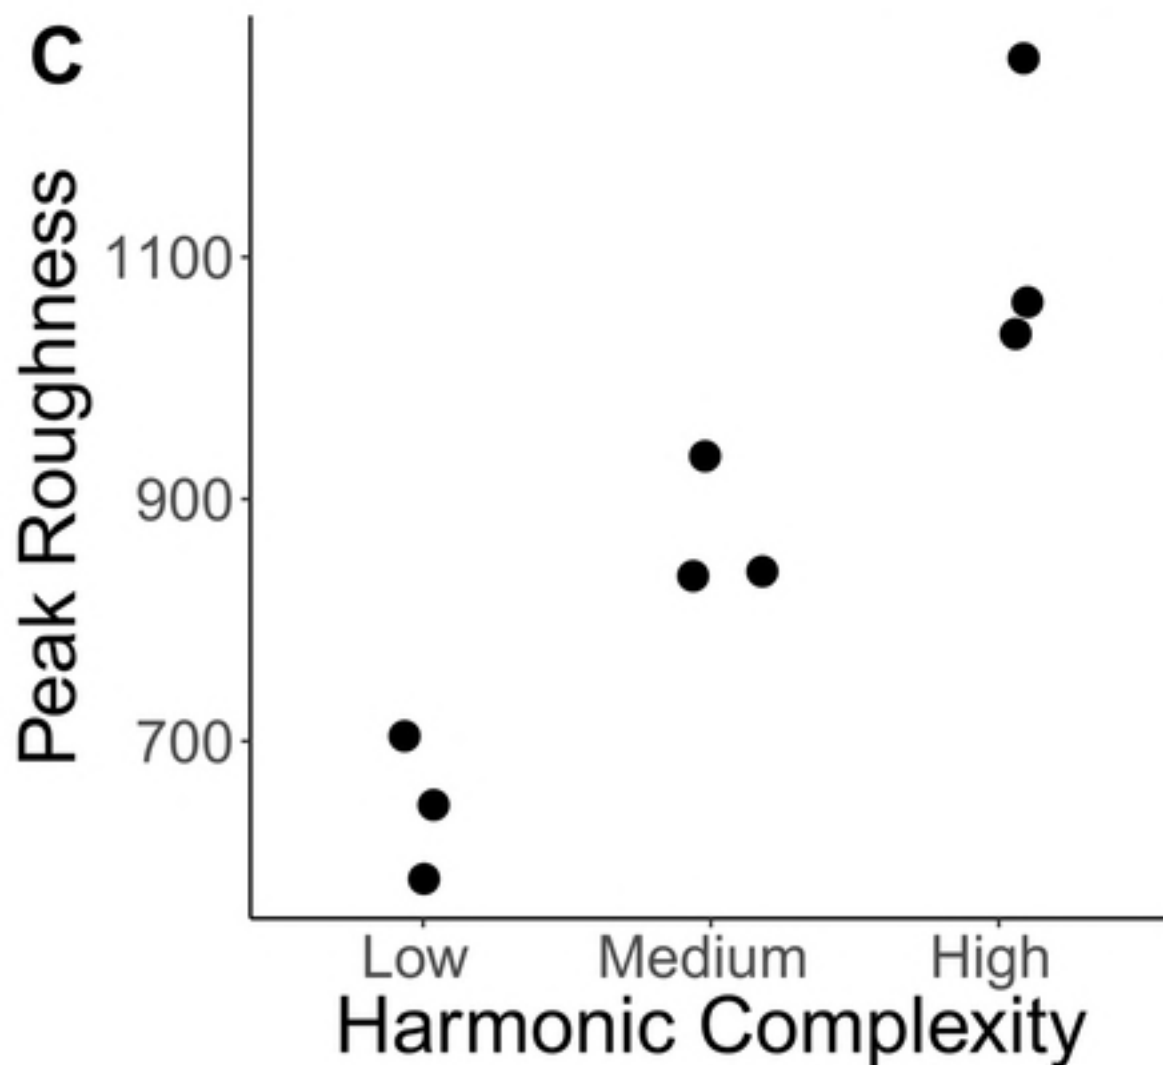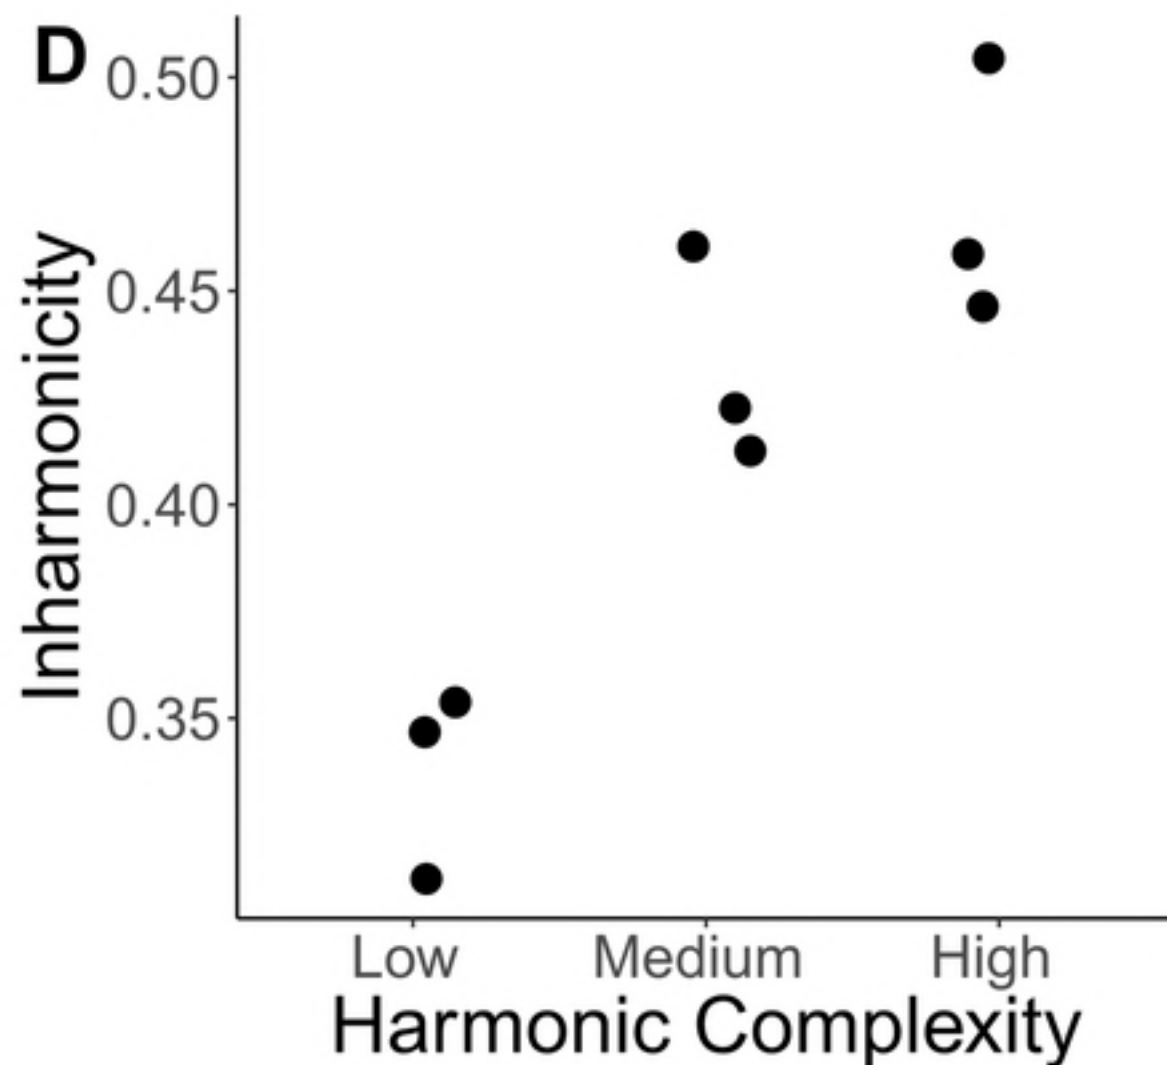

bioRxiv preprint doi: <https://doi.org/10.1101/415372>; this version posted September 12, 2018. The copyright holder for this preprint (which was not certified by peer review) is the author/funder, who has granted bioRxiv a license to display the preprint in perpetuity. It is made available under aCC-BY 4.0 International license.



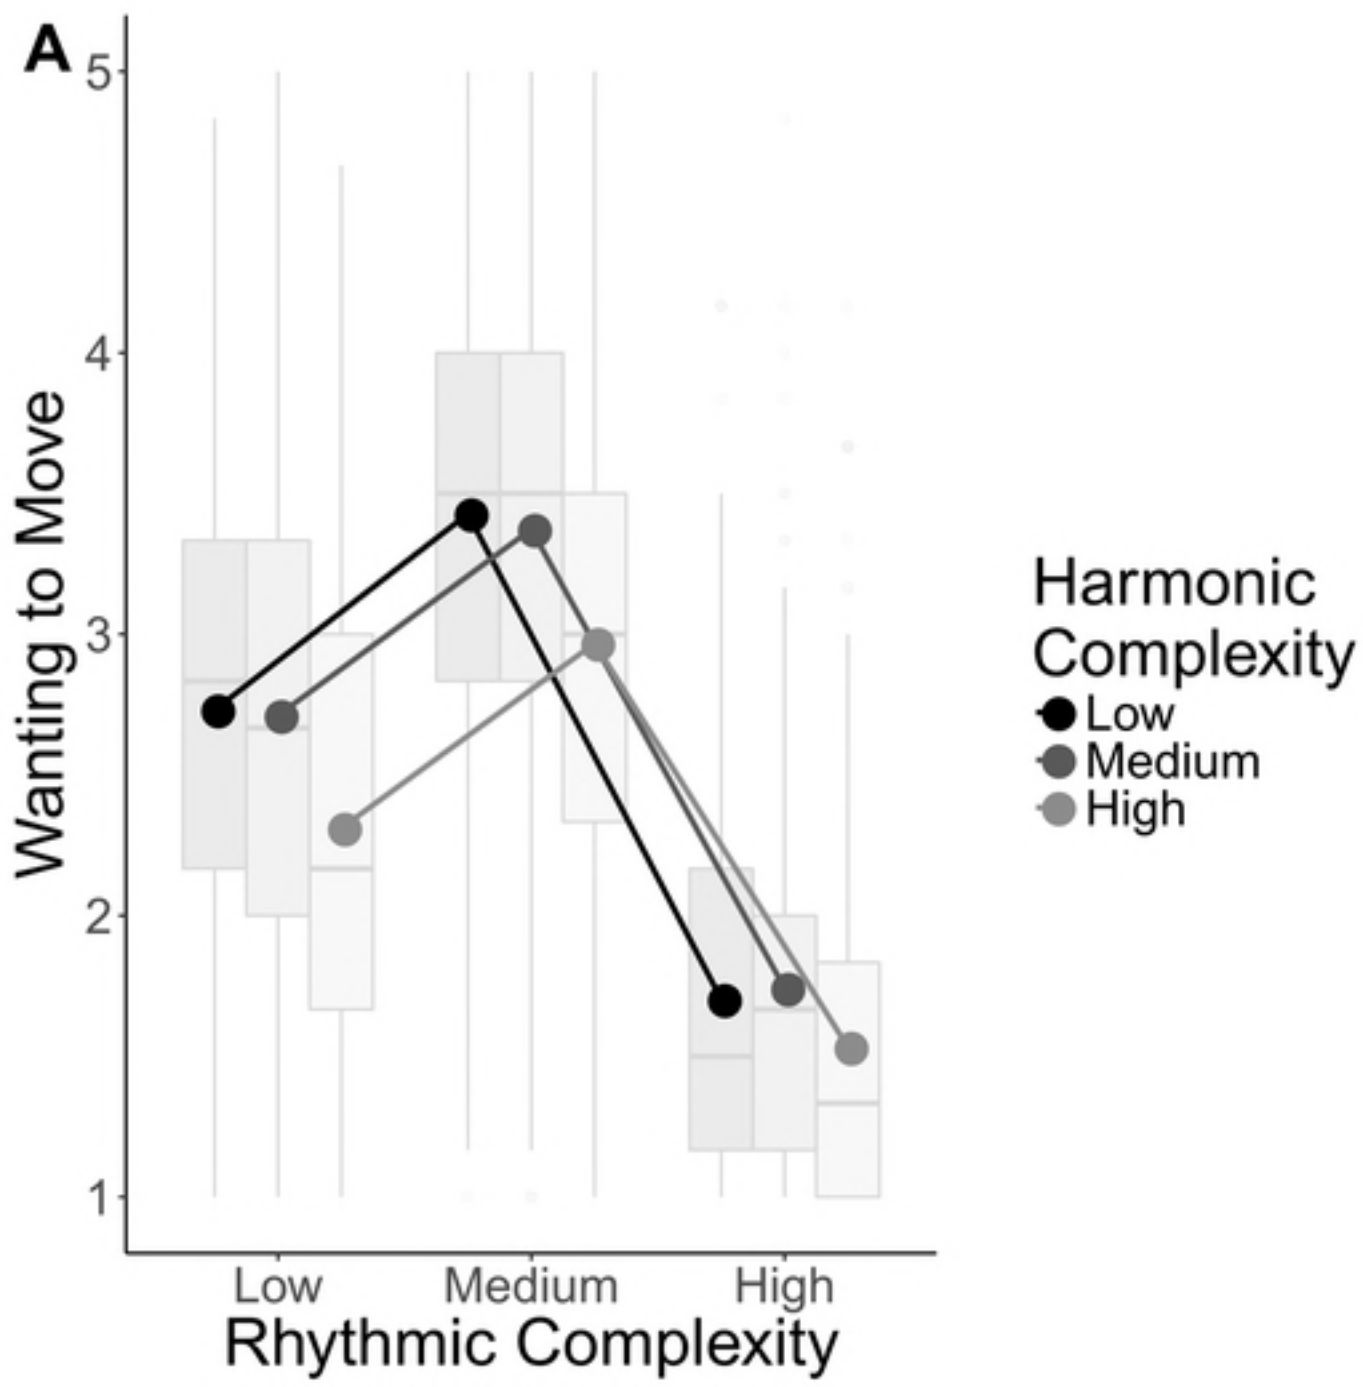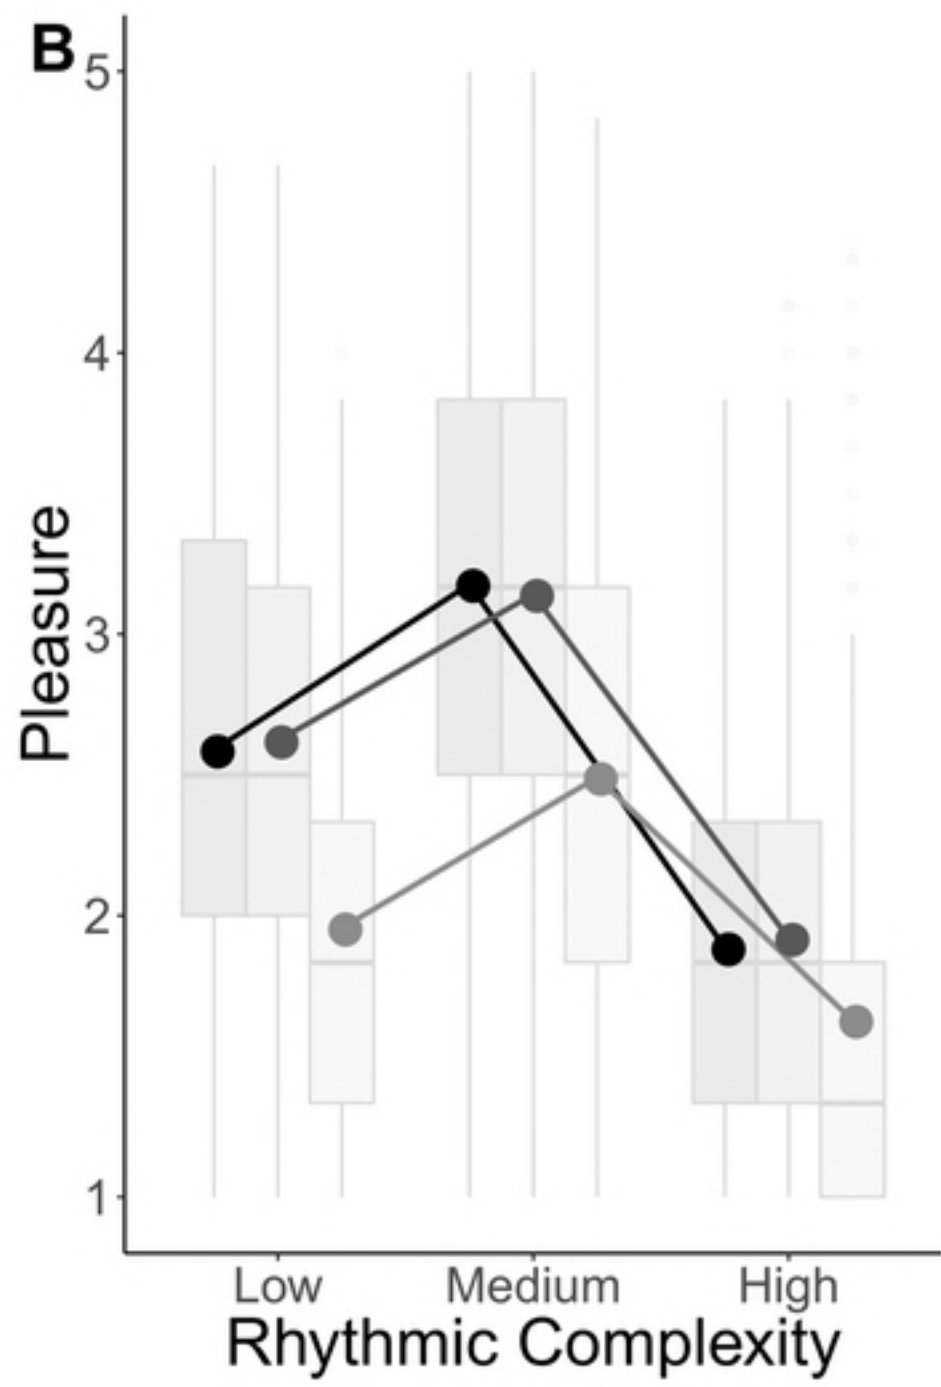

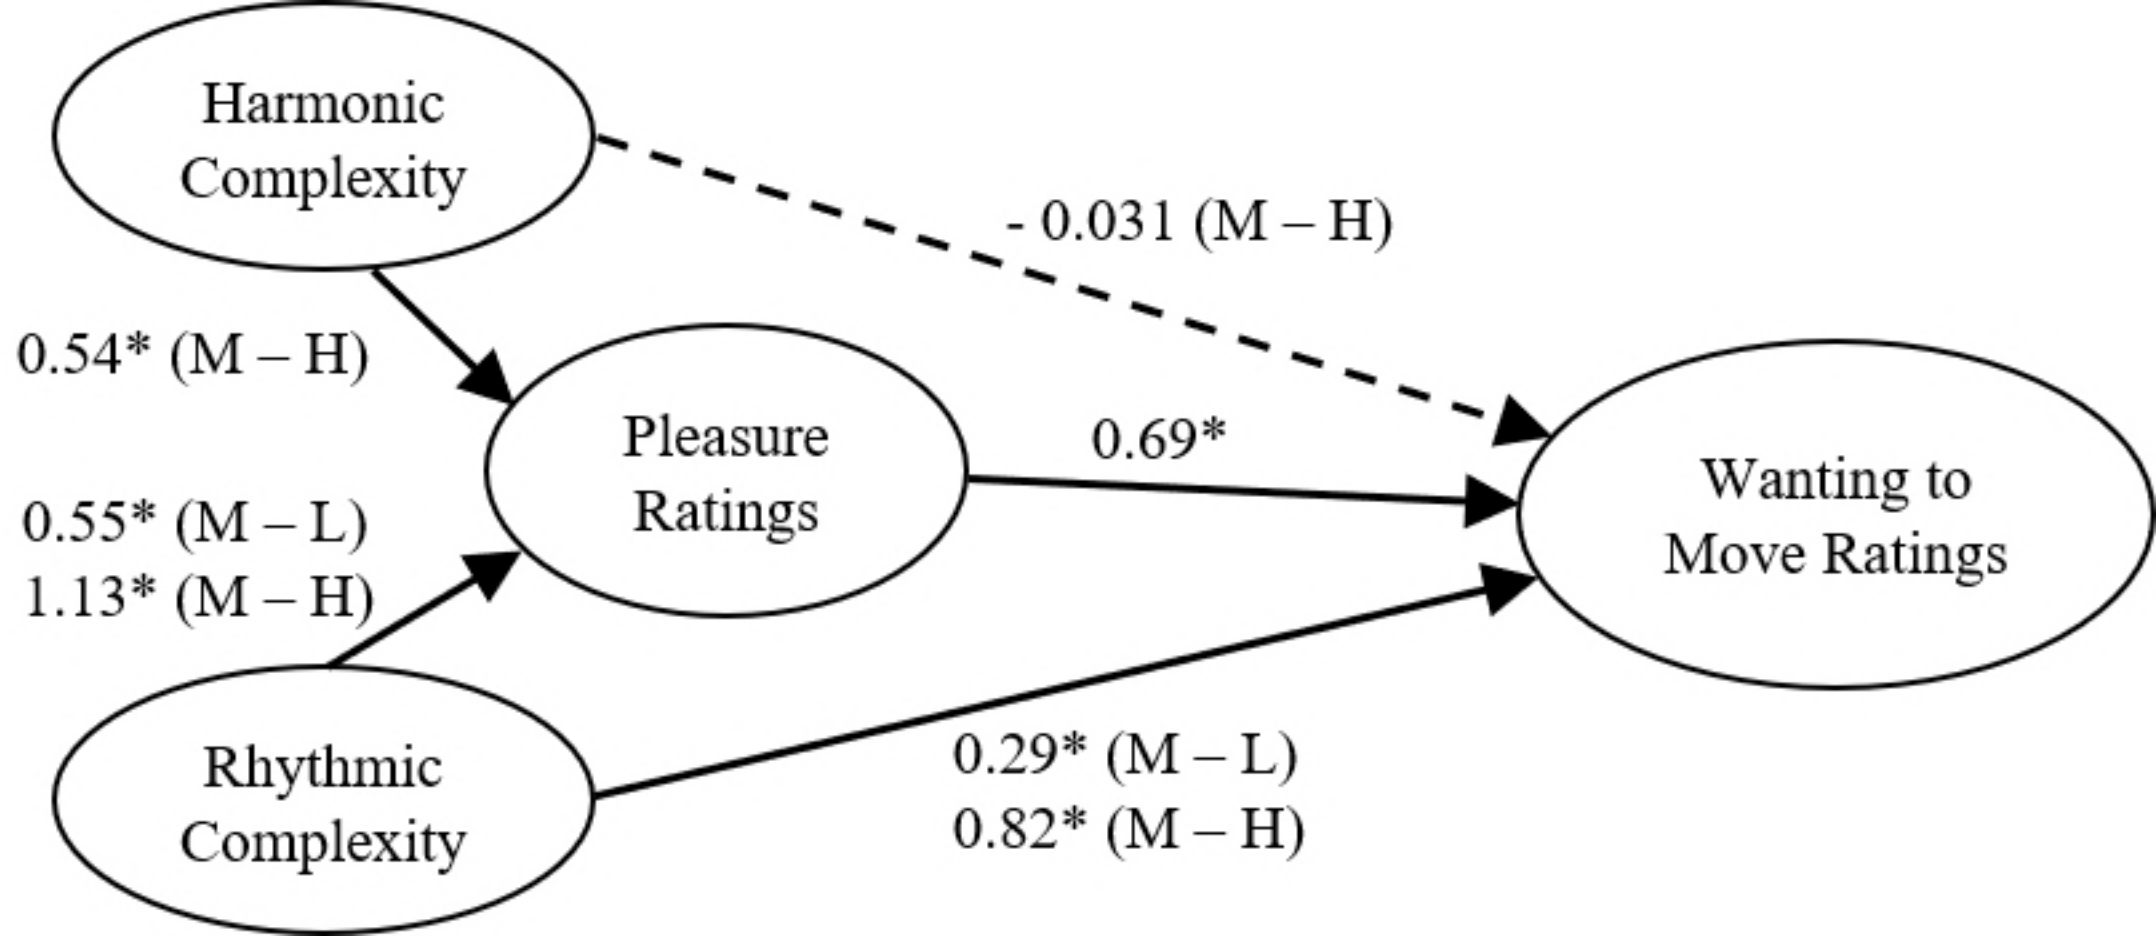

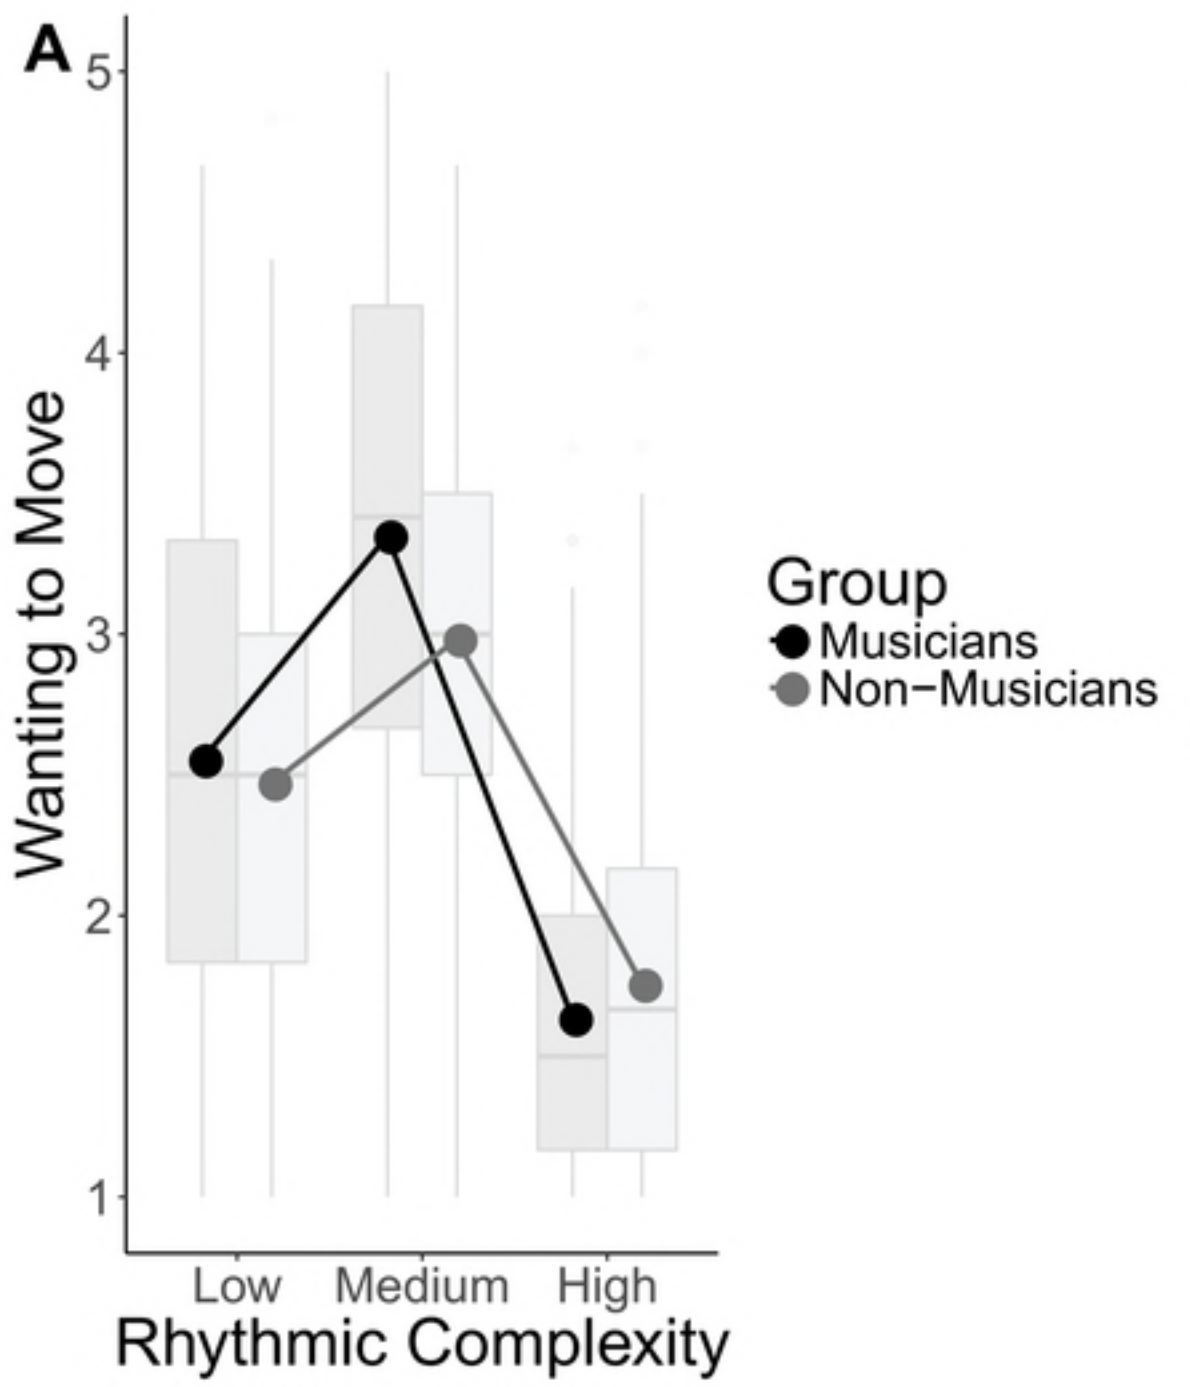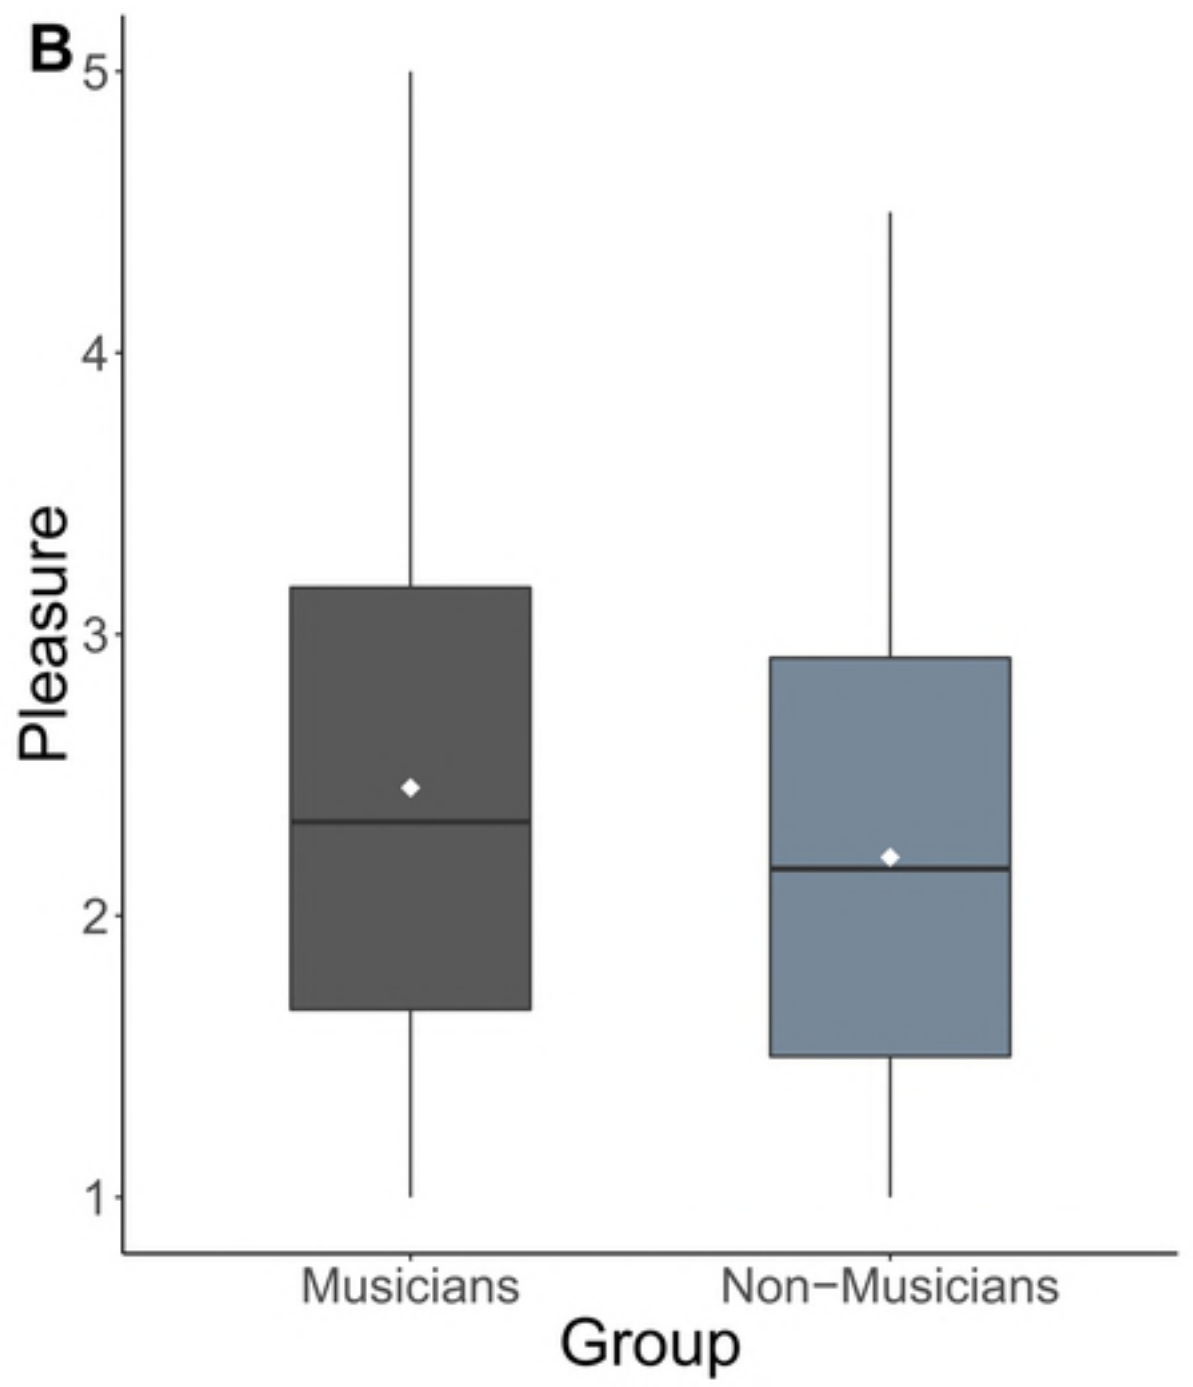

Source: https://www.biorxiv.org/content/10.1101/415372v1.full.pdf
